# Supplementary material for: RNA-Seq reveals the adaptive mechanisms of poplar varieties under different afforestation densities in semiarid regions
Source: Research Square preprint supplement (doi:10.21203/rs.3.rs-7975092/v1), 2025-11-17
Supplement: Supplementary file 2 [file a7d2bf7f1ef030dcd739ca52.xlsx]

## Sheet: Table S1
Table S1. The RNA-seq reads and mapping quality to the reference genome for 18 samples.
Samples	Raw Reads (M)	Raw Bases (G)	Clean Reads (M)	Clean Bases (G)	Clean Reads Rate (%)	Q30 (%)	Clean GC percent (%)	Mapped Reads	Mapping Rate (%)	Unique Mapped reads	Unique Mapping Rate (%)
HZL1	51.63	7.75	50.46	7.32	94.5	94.72	44.98	45643525	90.45	44287873	87.76
HZL2	49.85	7.48	48.66	7.07	94.55	94.44	45	43987078	90.39	42701544	87.75
HZL3	50.74	7.61	49.53	7.18	94.37	94.48	44.97	44697714	90.24	43382973	87.59
HHL1	51.38	7.71	50.25	7.3	94.68	94.53	44.69	45154535	89.86	43823547	87.21
HHL2	47.3	7.09	46.22	6.72	94.7	94.65	44.7	41567728	89.93	40359499	87.32
HHL3	48.18	7.23	47.09	6.85	94.83	94.67	44.74	42307381	89.84	41105485	87.29
HZX1	48.84	7.33	47.69	6.94	94.69	94.55	44.85	43667429	91.57	42405683	88.92
HZX2	51.65	7.75	50.52	7.37	95.16	94.66	44.77	46327694	91.71	44976025	89.03
HZX3	50.89	7.63	49.74	7.23	94.75	94.63	44.82	45602182	91.68	44293175	89.05
LZL1	49.52	7.43	48.43	7.03	94.63	94.62	44.94	43764902	90.37	42461549	87.68
LZL2	51.21	7.68	50.09	7.29	94.89	94.67	44.89	45277712	90.4	43919896	87.69
LZL3	49.14	7.37	48.14	7.02	95.26	95.02	44.87	43604114	90.57	42311629	87.89
LHL1	48.91	7.34	47.88	6.98	95.08	94.92	44.91	42477049	88.72	41137287	85.92
LHL2	47.25	7.09	46.25	6.73	94.92	94.83	44.87	40993004	88.64	39727373	85.9
LHL3	51.45	7.72	50.25	7.3	94.62	94.45	44.8	44548440	88.65	43159275	85.88
LZX1	49.8	7.47	48.57	7.07	94.59	94.3	44.89	44720320	92.08	43396675	89.36
LZX2	48.48	7.27	47.32	6.89	94.78	94.51	44.93	43591637	92.11	42254856	89.29
LZX3	47.95	7.19	46.83	6.81	94.66	94.59	44.96	43131199	92.11	41830291	89.33

## Sheet: Tabel S2
Table S2 Total number of expressed genes
Sample name	Total number of expressed genes
HZL1	27162
HZL2	27209
HZL3	27240
HHL1	27679
HHL2	27570
HHL3	27479
HZX1	27365
HZX2	27396
HZX3	27405
LZL1	27288
LZL2	27298
LZL3	27238
LHL1	27497
LHL2	27445
LHL3	27553
LZX1	26955
LZX2	27029
LZX3	27024
