# Supplementary figures and images for: RNA-Seq reveals the adaptive mechanisms of poplar varieties under different afforestation densities in semiarid regions
Source: Research Square preprint supplement (doi:10.21203/rs.3.rs-7975092/v1), 2025-11-17

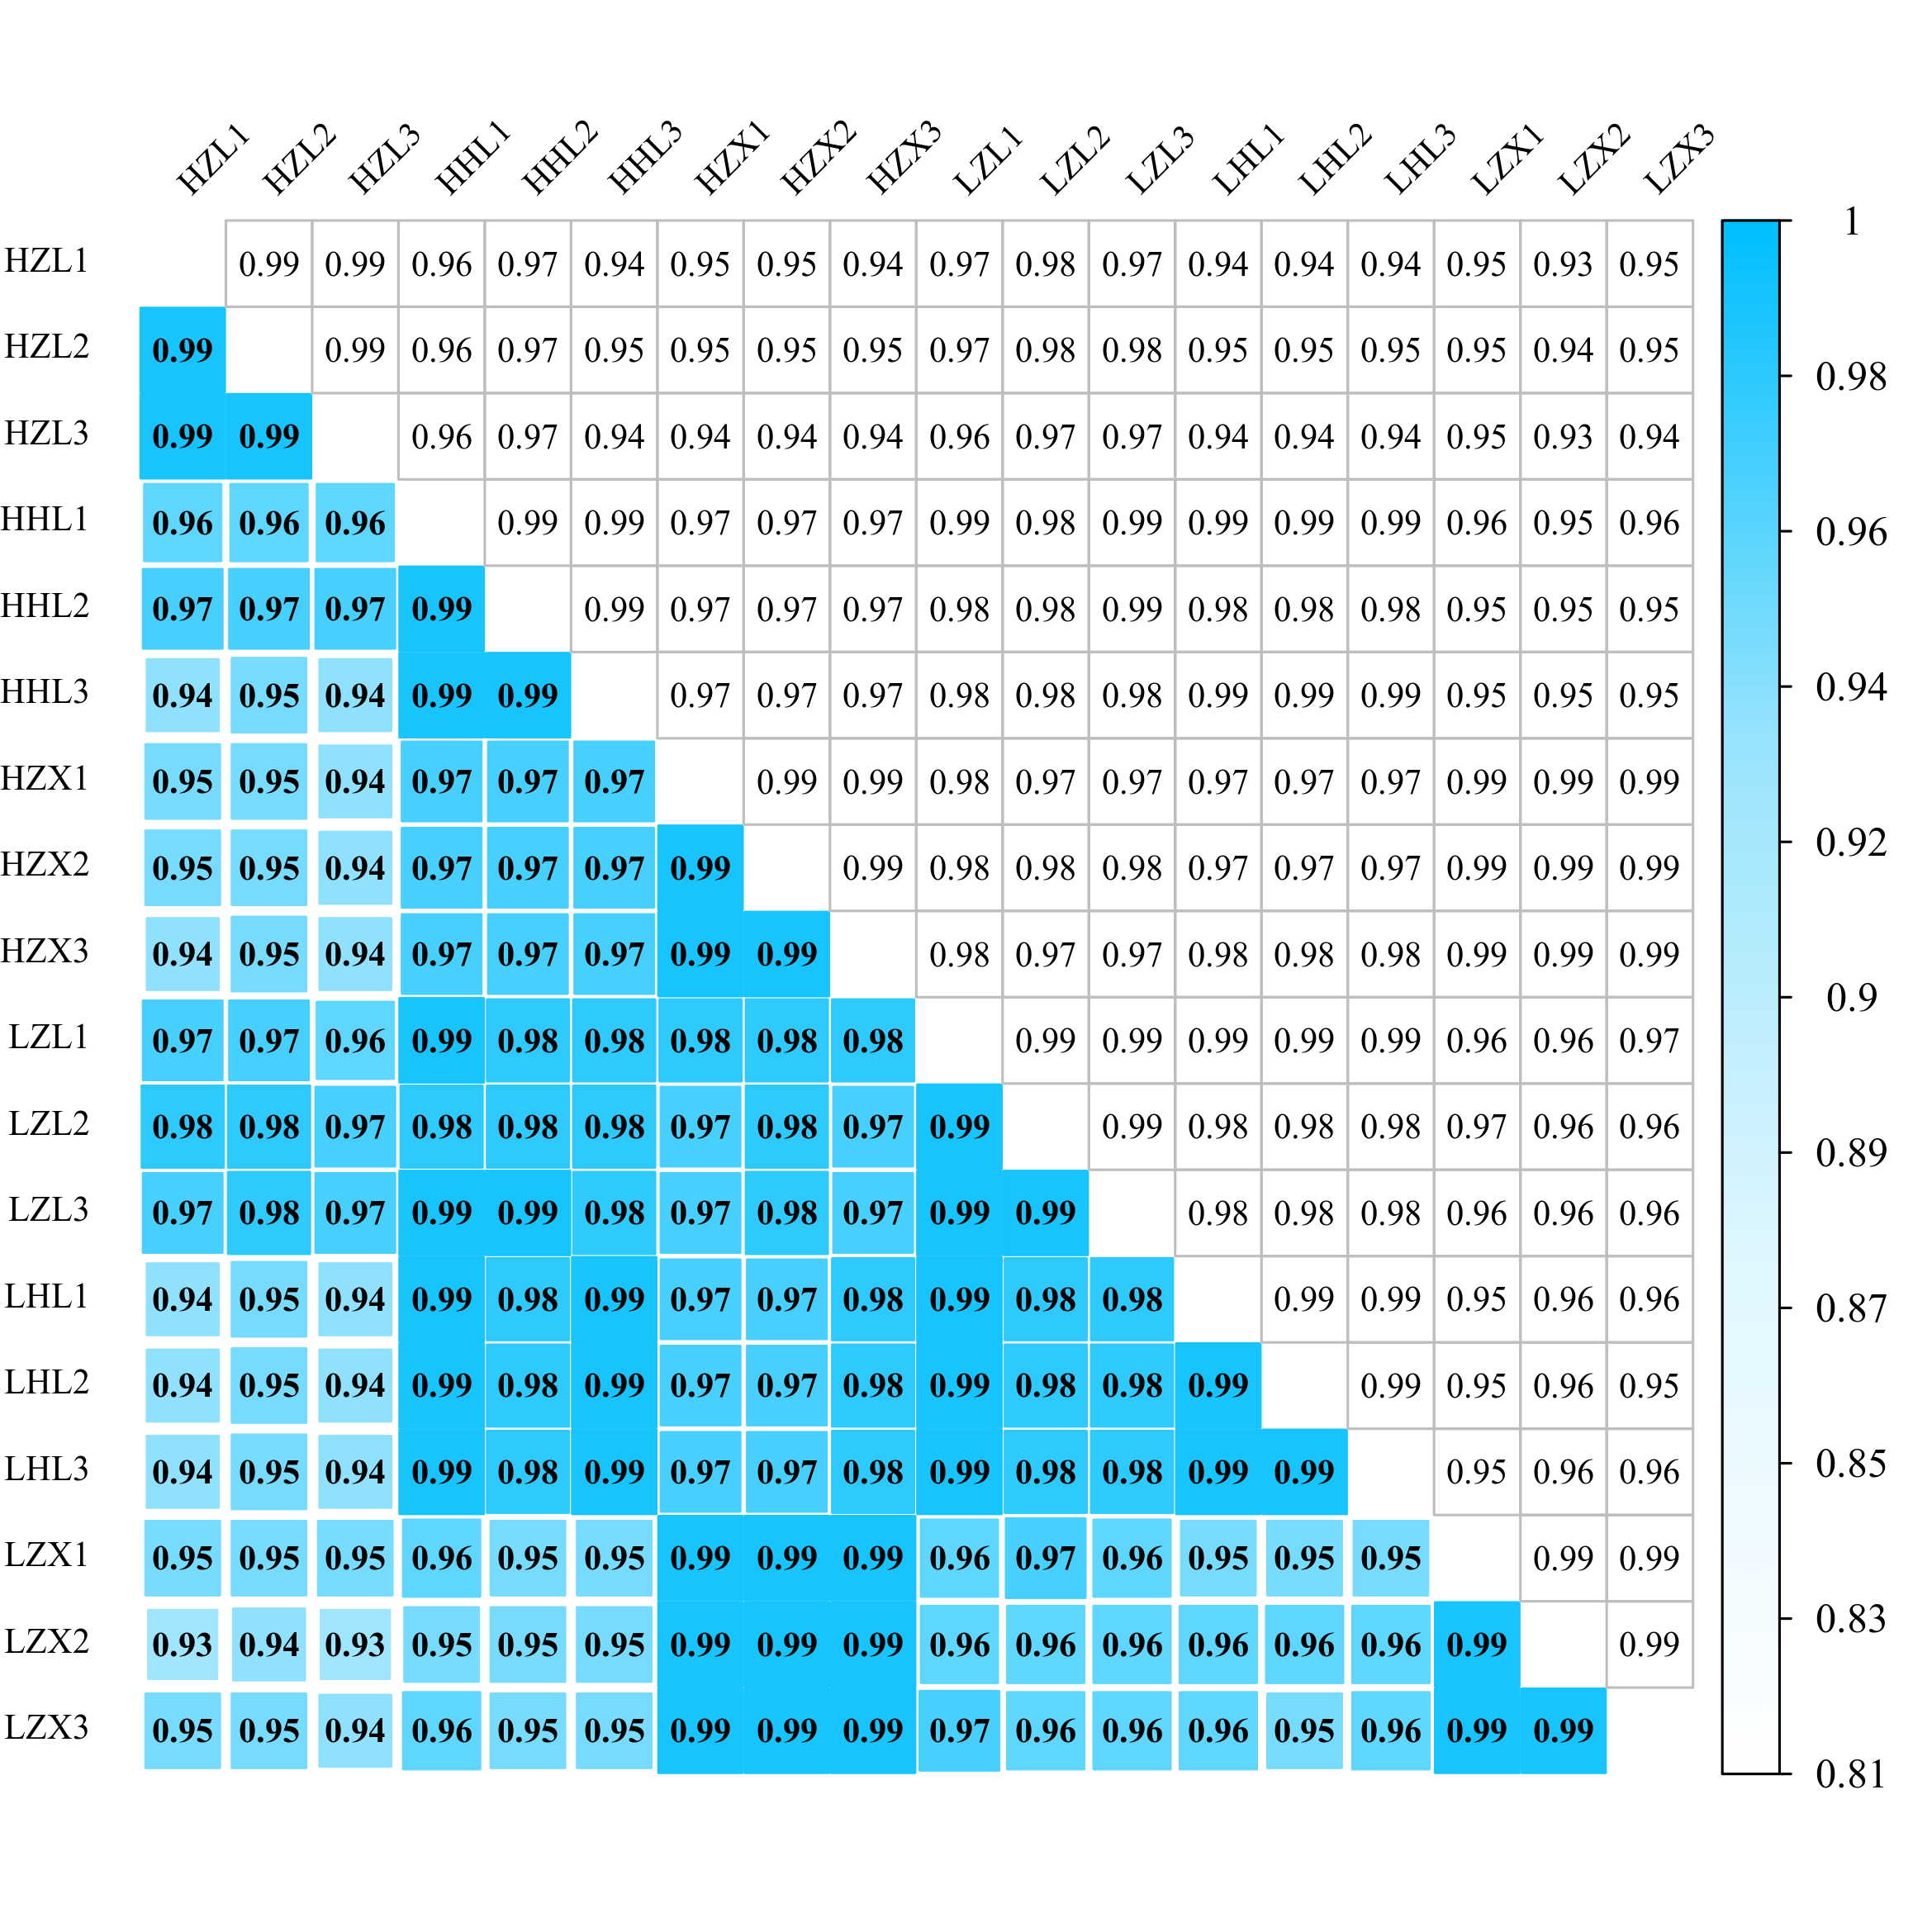


**FIGURE S1** Correlation heatmap of FPKM of 18 samples.

Supplement: Supplementary file 1 [file 050d79d55f1ab7895b53993d.docx]
